# Supplementary figures and images for: Exploring Microbial Rhizosphere Communities in Asymptomatic and Symptomatic Apple Trees Using Amplicon Sequencing and Shotgun Metagenomics
Source: MDPI journal article supplement (doi:10.3390/agronomy14020357), 2024-02-09

(a)

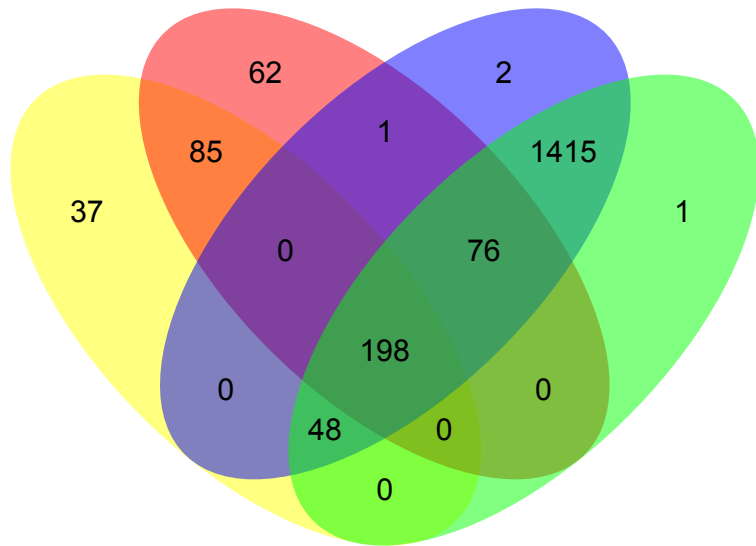

(b)

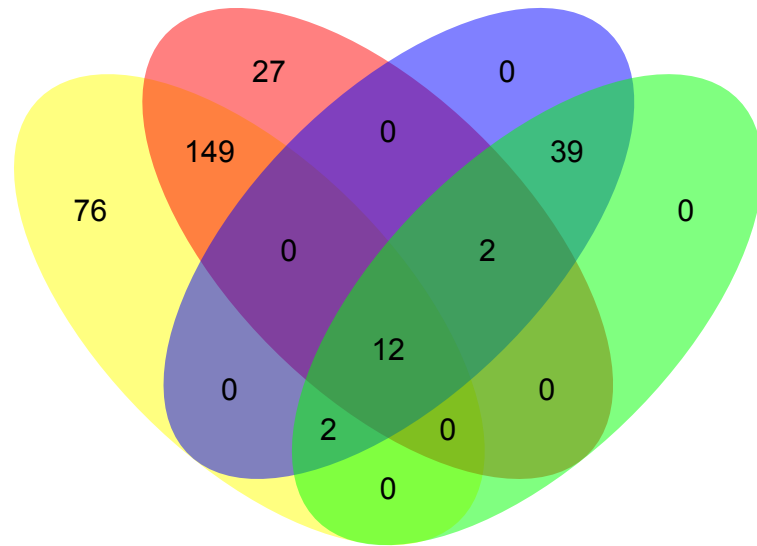

Legend

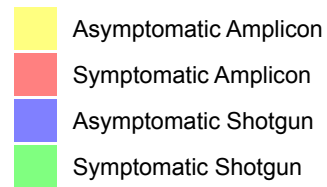

Supplement: s1 [file s1]

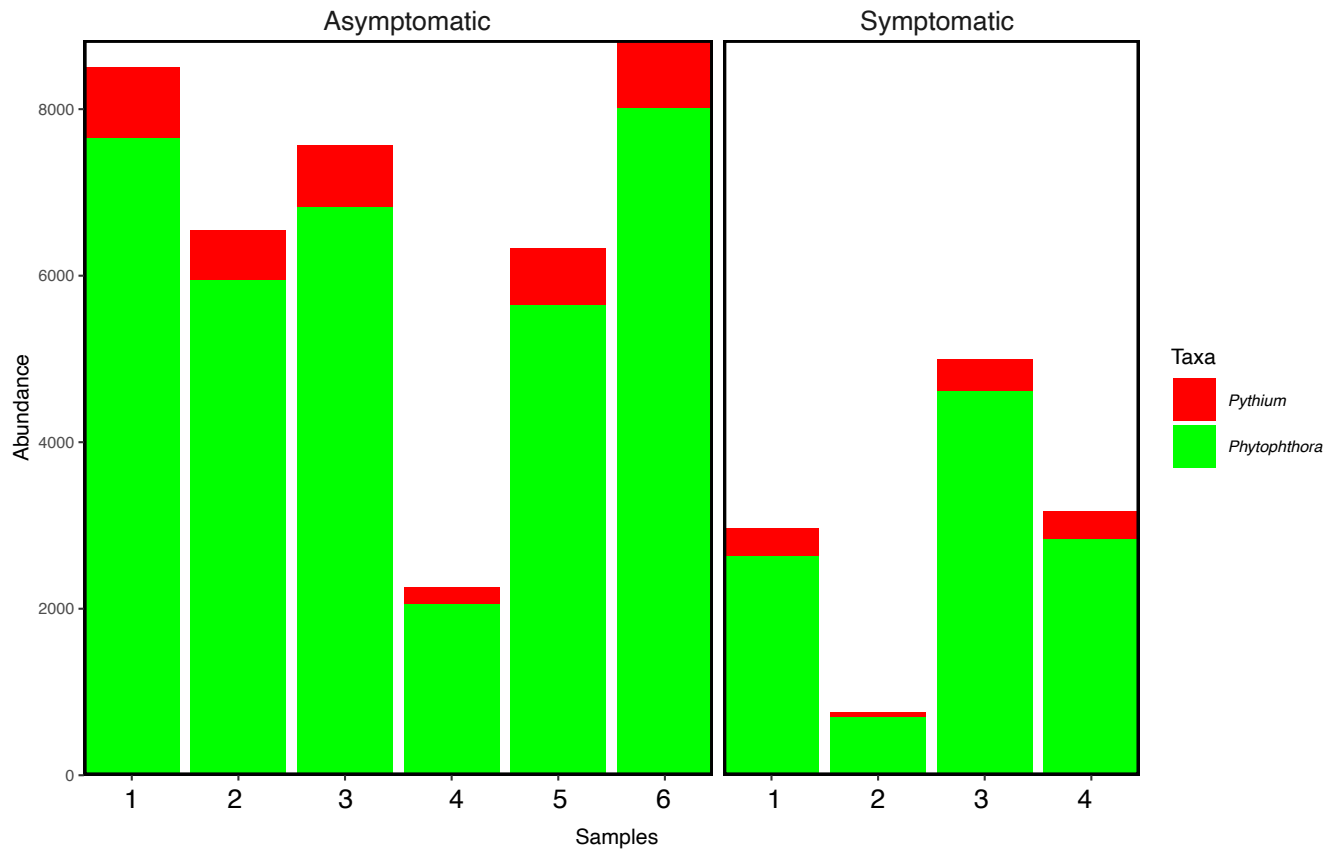

Supplement: s1 [file s1]
